# Supplementary material for: 3′ UTR G-quadruplexes regulate miRNA binding
Source: PubMed Central journal article supplement (PMC5513062; doi:10.1261/rna.060962.117), 2017-08
Supplement: supp_060962.117_Supplemental_Material.pdf [file supp_060962.117_Supplemental_Material.pdf]

### List of Supplementary Tables

- Supplementary Table 1.** G-Quadruplexes in the 3'UTR overlapping with microRNA binding sites
- Supplementary Table 2.** Sequences of the primers used.

### List of Supplementary figures

- Supplementary Figure 1.** In-line probing of ELK1, HDGF, THRB, and WNT3A.
- Supplementary Figure 2.** N-methyl Mesoporphyrin IX fluorescence assay of ELK1, HDGF, THRB, and WNT3A.
- Supplementary Figure 3.** Other tested G4 do not regulate miRNA binding.
- Supplementary Figure 4.** Effect of a mir331 inhibitor on FADS2 reporter expression.

### List of Supplementary files

- Supplementary File 1.** G4 in the 3'UTR of human mRNAs

This file contains the list of G4 found in the 3'UTR of human genes, along with information on the gene, position within the 3'UTR(1 being the first nucleotide after the stop codon), length, sequence of the G4, and the cG/cC score.

- Supplementary File 2.** G4 overlapping with miRNA binding sites

This file contains the list of G4 predicted to be bound by miRNAs. The alignment was made with the predicted G4 and 10 flanking nucleotides on each side, therefore the alignment position 1 refers to 10 less than the “Position” column in Supplementary File 1.

**Supplementary File 3.                    Gene Ontology analysis of the predicted miRNA bound G4**

This file contains the list of enriched biological process in the G4 predicted to be overlapping miRNA binding sites.

**Supplementary File 4.                    Instructions for the miRP scripts**

This is the user manual for the miRP scripts used to predict the miRNA binding sites.

**Supplementary Table 1. G-Quadruplexes in the 3'UTR overlapping with microRNA binding sites**

| Genes containing at least 1 G4 | Total number of G4 | Genes containing at least 1 G4 predicted to overlap with 1 miRNA binding site | Total number of G4 predicted to overlap with at least 1 miRNA binding site | miRNAs predicted to bind at least 1 G4 | G4/miRNA pair | miRNA binding sites predicted to bind exclusively in G4's loop |
|--------------------------------|--------------------|-------------------------------------------------------------------------------|----------------------------------------------------------------------------|----------------------------------------|---------------|----------------------------------------------------------------|
| 1,112                          | 2,282              | 611                                                                           | 1,233                                                                      | 521                                    | 44,294        | 13,361                                                         |

**Supplementary Table 2. Sequences of the primers used.**

| Name                | Sequence                                                                                            |
|---------------------|-----------------------------------------------------------------------------------------------------|
| T7 2G               | taatacgactcactatagg                                                                                 |
| FADS2 WT            | TCATGAGGTACCCCCTCCCCAGCCCCTCAGGGCAGCCTCCTCCTGA<br>GACTCCCTCCCGCTCTGCCTCCCTGGCCtatagtgagtcgtatta     |
| FADS2 G/A mutant    | TCATGAGGTACCTTCTCTTCAGCCCCTCAGGGCAGCCTCCTCCTGAG<br>ACTCTCTCTCGCTCTGCCTCCCTGGCCtatagtgagtcgtatta     |
| FADS2 Target mutant | TCATGAGGTACCCCCTCCCCACGTTCTCAGGGCAGCCTCCTCCTGA<br>GACTCCCTCCCGCTCTGCCTCCCTGGCCtatagtgagtcgtatta     |
| ELK1 WT             | TATGTCCCCATTCTCCCTCCCAACTCCAGGGACATTGAAAGGGTC<br>CTTTGTACCCGCCCGCAGGAAATTGGGGCtatagtgagtcgtatta     |
| ELK1 G/A mutant     | TATGTCCCCATTCTCTCTCAACTCCAGGGACATTGAAAGGGTC<br>CTTTGTACTCGCTCGCAGGAAATTGGGGCtatagtgagtcgtatta       |
| EIK1 Target mutant  | TATGTCCCCATTCTCCCTCCCAACTGCGTTGACATTGAAAGGGTC<br>CTTTGTACCCGCCCGCAGGAAATTGGGGCtatagtgagtcgtatta     |
| HDGF WT             | CGCCCTCTGTGCTGCCCCACCCCGCATTTGAGGATTGCCCTCCC<br>AGGCCCCACAAGCCACCTGCTGTTGATGCTCtatagtgagtcgtatta    |
| HDGF G/A mutant     | CGCCCTCTGTGCTGCTTTCACTTCGCATTTGAGGATTGCCCTCCC<br>AGGCCCCACAAGCTCACTCTGCTGTTGATGCTCtatagtgagtcgtatta |
| HDGF Target mutant  | CGCCCTCTGTGCTGCCCCACCCCGCATTTGAGGTGTACCCCTCCC<br>AGGCCCCACAAGCCACCTGCTGTTGATGCTCtatagtgagtcgtatta   |
| THRB WT             | GACTACTCCCTTTTCCCTCCCAATAATCCCTCCCAACACAAAGAA<br>ACtatagtgagtcgtatta                                |
| THRB G/A mutant     | GACTACTCCCTTTTCCCTCCCAATAATCTCTCTCAACACAAAGAA<br>ACtatagtgagtcgtatta                                |
| THRB Target mutant  | GACTACTCTCTCTCCCTCCCAATAATCCCTCCCAACACAAAGAA<br>ACtatagtgagtcgtatta                                 |

|                           |                                                                                 |
|---------------------------|---------------------------------------------------------------------------------|
| Wnt3A WT                  | TTCCCAGGGAAGAGTCCCACCCGCGGAGAGAAGCCCCGCCCAT<br>GGAGCTGGTCCctatagtgagtcgtatta    |
| Wnt3A G/A mutant          | TTCCCAGGGAAGAGTCCCACCCGCGGAGAGAAGCTTCGCTTCATTG<br>GAGCCTGGTCCctatagtgagtcgtatta |
| Wnt3A Target mutant       | TTCCCAGGGACGTTACCCACCCGCGGAGAGAAGCCCCGCCCAT<br>GAGCCTGGTCCctatagtgagtcgtatta    |
| Mir331                    | GCCCCUGGGCCUAUCCUAGAA                                                           |
| Control miRNA             | UUGUACUACACAAAAGUACUG                                                           |
| hsa-miR-331-3p.SpFwd_RT   | GTCGTATCCAGTGCA GGG TCCGA GGTATTCGCACTGGATA<br>CGACTTCTAG                       |
| hsa-miR-16-5p.SpFwd_RT    | GTCGTATCCAGTGCA GGG TCCGA GGTATTCGCACTGGATA<br>CGACCGCCAA                       |
| hsa-miR-142-3p.SpFwd_RT   | GTCGTATCCAGTGCA GGG TCCGA GGTATTCGCACTGGATA<br>CGACTCCATA                       |
| hsa-let-7a-5p.SpFwd_RT    | GTCGTATCCAGTGCA GGG TCCGA GGTATTCGCACTGGATA<br>CGACA ACTAT                      |
| hsa-miR-331-3p.SpFwd_qpcr | GCGCCCCTGGGCCTATC                                                               |
| hsa-miR-16-5p.SpFwd_qpcr  | GCTGTCTGTAGCAGCACGTAAATA                                                        |
| hsa-miR-142-3p.SpFwd_qpcr | GCTGTCTGTAGTGT TTTCTACTT                                                        |
| hsa-let-7a-5p.SpFwd_qpcr  | GCTGTCTGTAGGTAGTAGGTTGT                                                         |
| shared-q-pcr_mir_rev      | GTGCAGGGTCCGAGGT                                                                |
| Mir331 inhibitor          | mU/ZEN/mUmCmUmAmGmGmAmUmAmGmGmCmCmCm<br>AmGmGmGmG/3ZEN/                         |

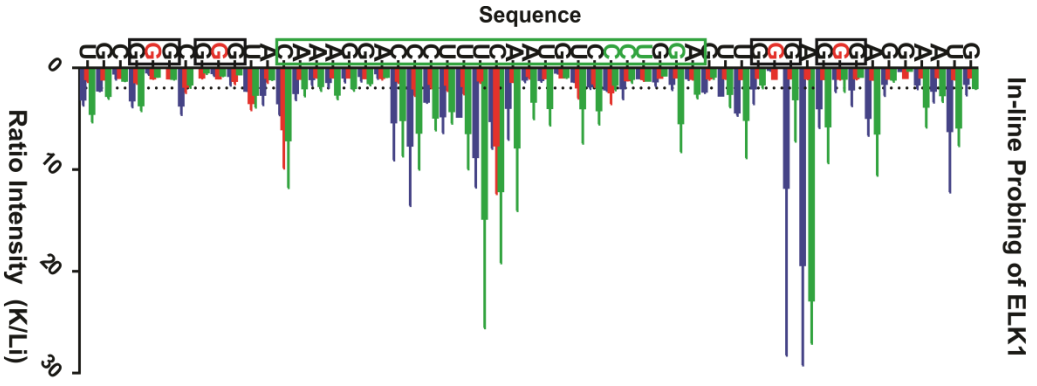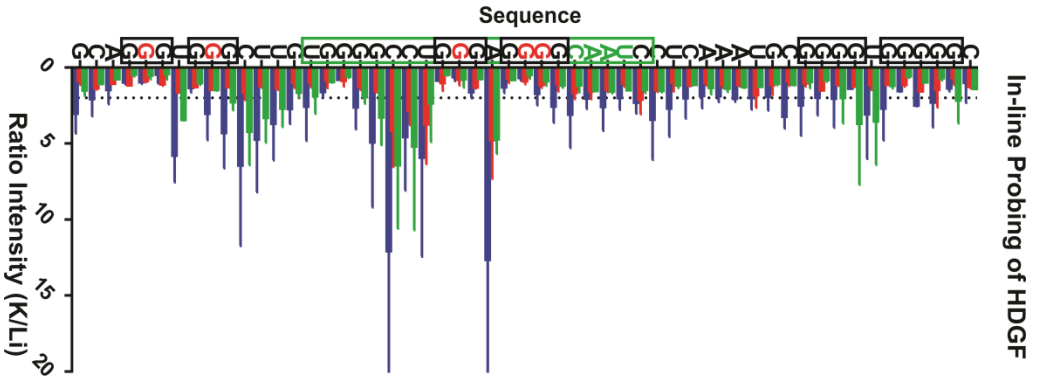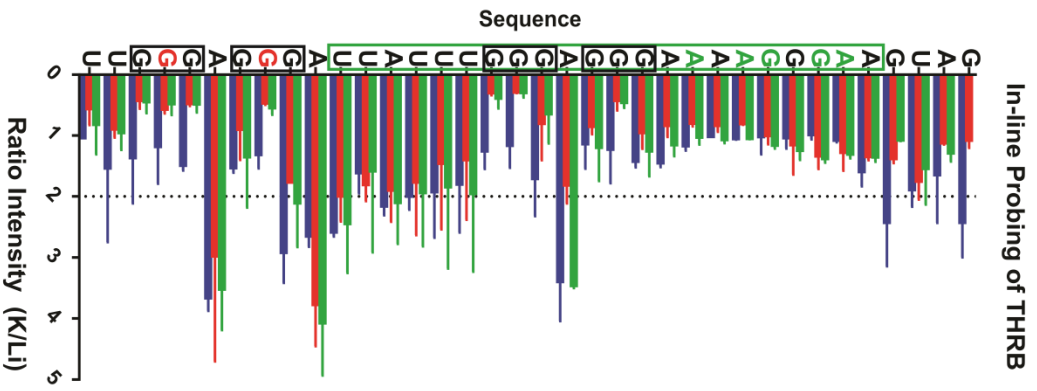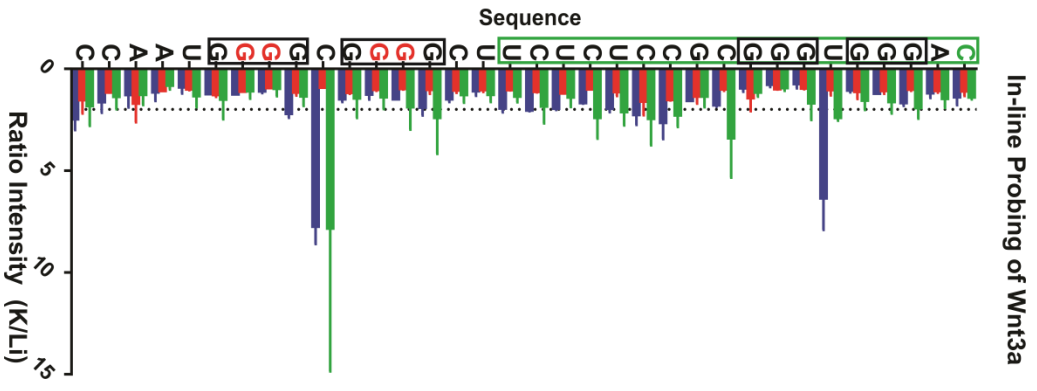

█ Wildtype  
█ G/A-mutant  
█ Target Mutant

**Supplementary Figure 1. In-line probing of ELK1, HDGF, THRB, and WNT3A.**

In-line probing experiments were performed in the presence of either  $K^+$  (favors G4) or  $Li^+$  (does not favor G4) for the wild type, the G/A mutant and the target mutant of each gene. Each band was quantified and a  $K^+/Li^+$  ratio was calculated for each nucleotide. A ratio  $>2$  for the nucleotides located in the loops indicates G4 folding. The means and standard deviations were calculated from two different experiments. The guanines involved in the G4 are boxed in black and nucleotides mutated in the G/A mutants are shown in red. The miRNA binding sites are boxed in green and the nucleotides mutated in the target mutants are shown in green.

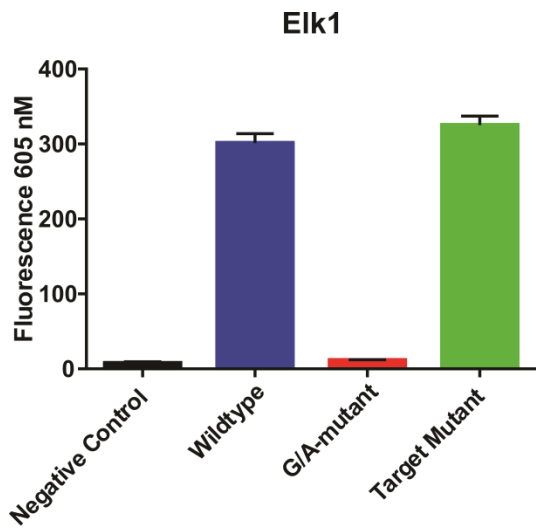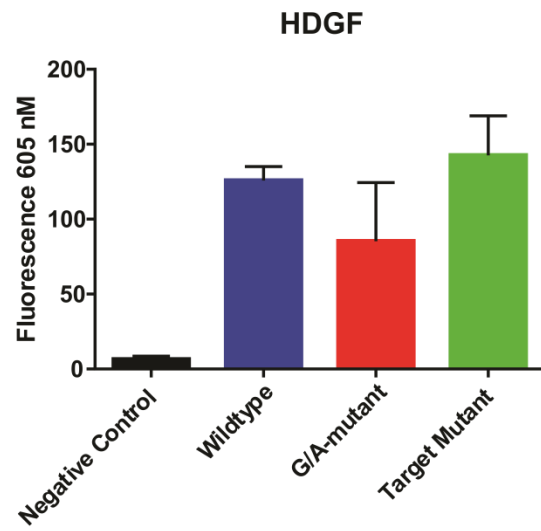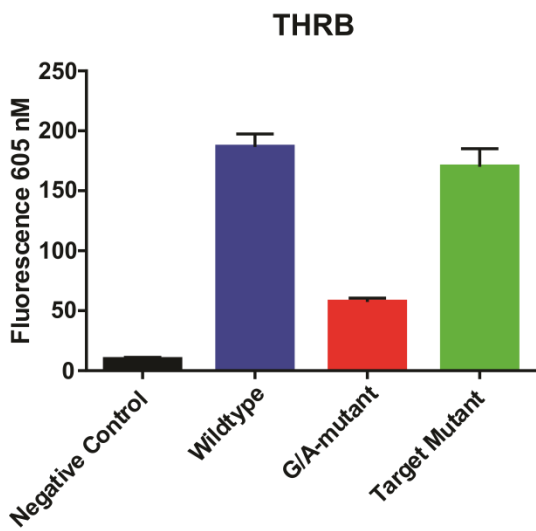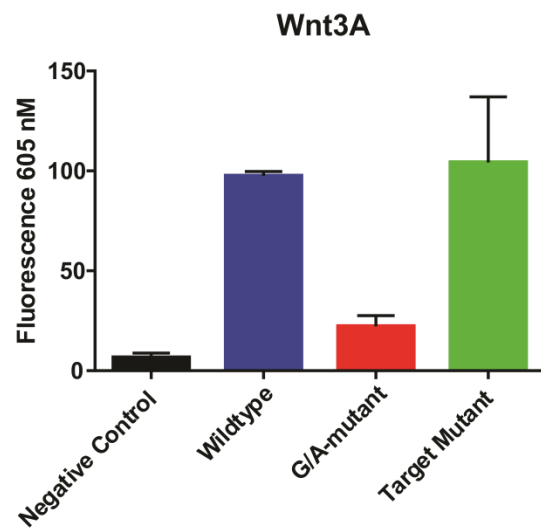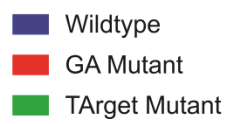

**Supplementary Figure 2. N-methyl Mesoporphyrin IX fluorescence assay of ELK1, HDGF, THRB, and Wnt3A.**

The NMM fluorescence measured in the presence of each gene and of both its respective G/A and target mutants are shown. The means and standard deviations were calculated from two different experiments.



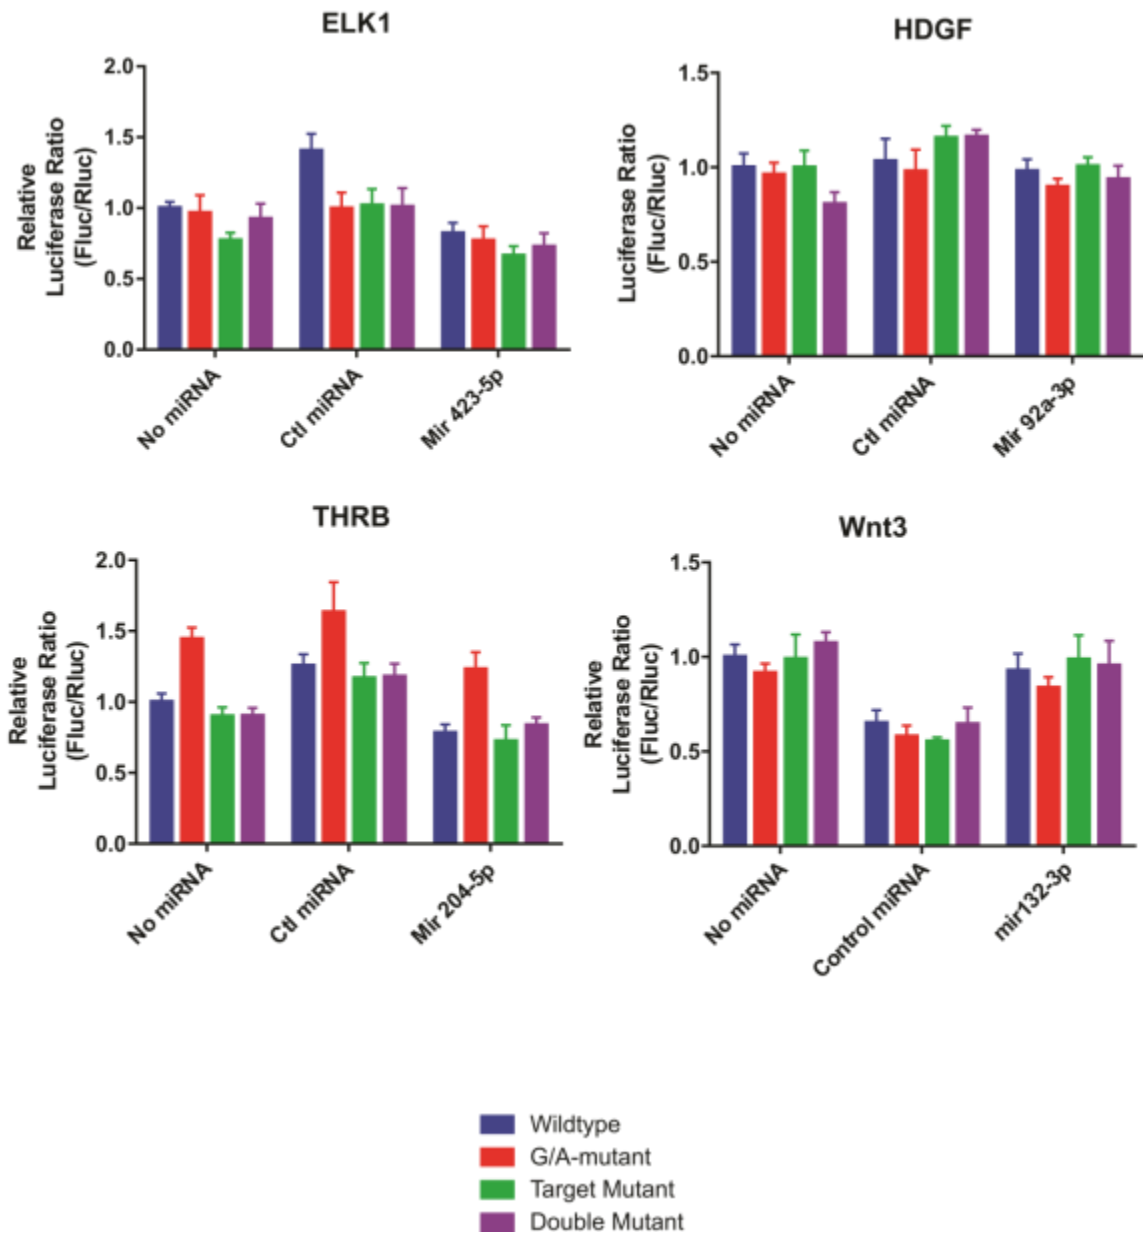

**Supplementary Figure 3. Other tested G4 do not regulate miRNA binding.**

Different ELK1, HDGF, THRB, and Wnt3A constructs (Wild type, G/A mutant, Target mutant, and Double mutant) were transfected into either HEK 293 (ELK1 THRB), Huh7 (HDGF), or HCT116

(WNT3A) cells either alone, with a control synthetic miRNA or the appropriate synthetic miRNA and the luciferase activity were measured.

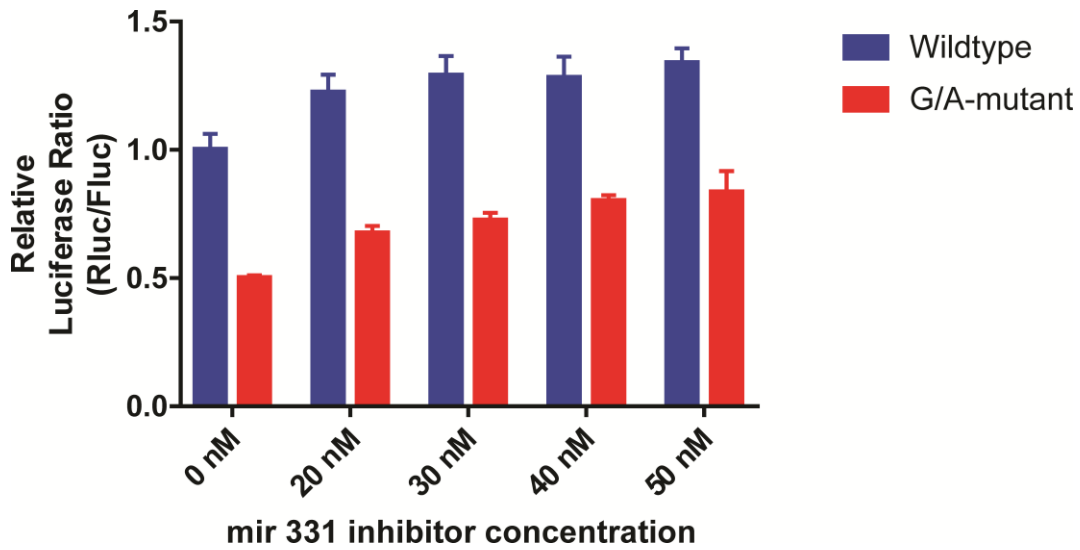

**Supplementary Figure 4. Effect of a mir331 inhibitor on FADS2 reporter expression.**

Various concentrations of Mir331 inhibitor were transfected into HEK 293 cells. On the following day, FADS2 wild type and GA reporter luciferase were transfected. Luciferase activity was assessed on the day after the second transfection.
